# Supplementary material for: Multi-Institutional Evaluation of Bladder Elongation Psoas Hitch (BEPH): A Safe and Durable Solution for Mid to Distal Ureteral Strictures
Source: Research Square preprint supplement (doi:10.21203/rs.3.rs-6796217/v1), 2025-07-14
Supplement: Supplementary file 1 [file 518faf7eedef0cdf6c779d55.docx]

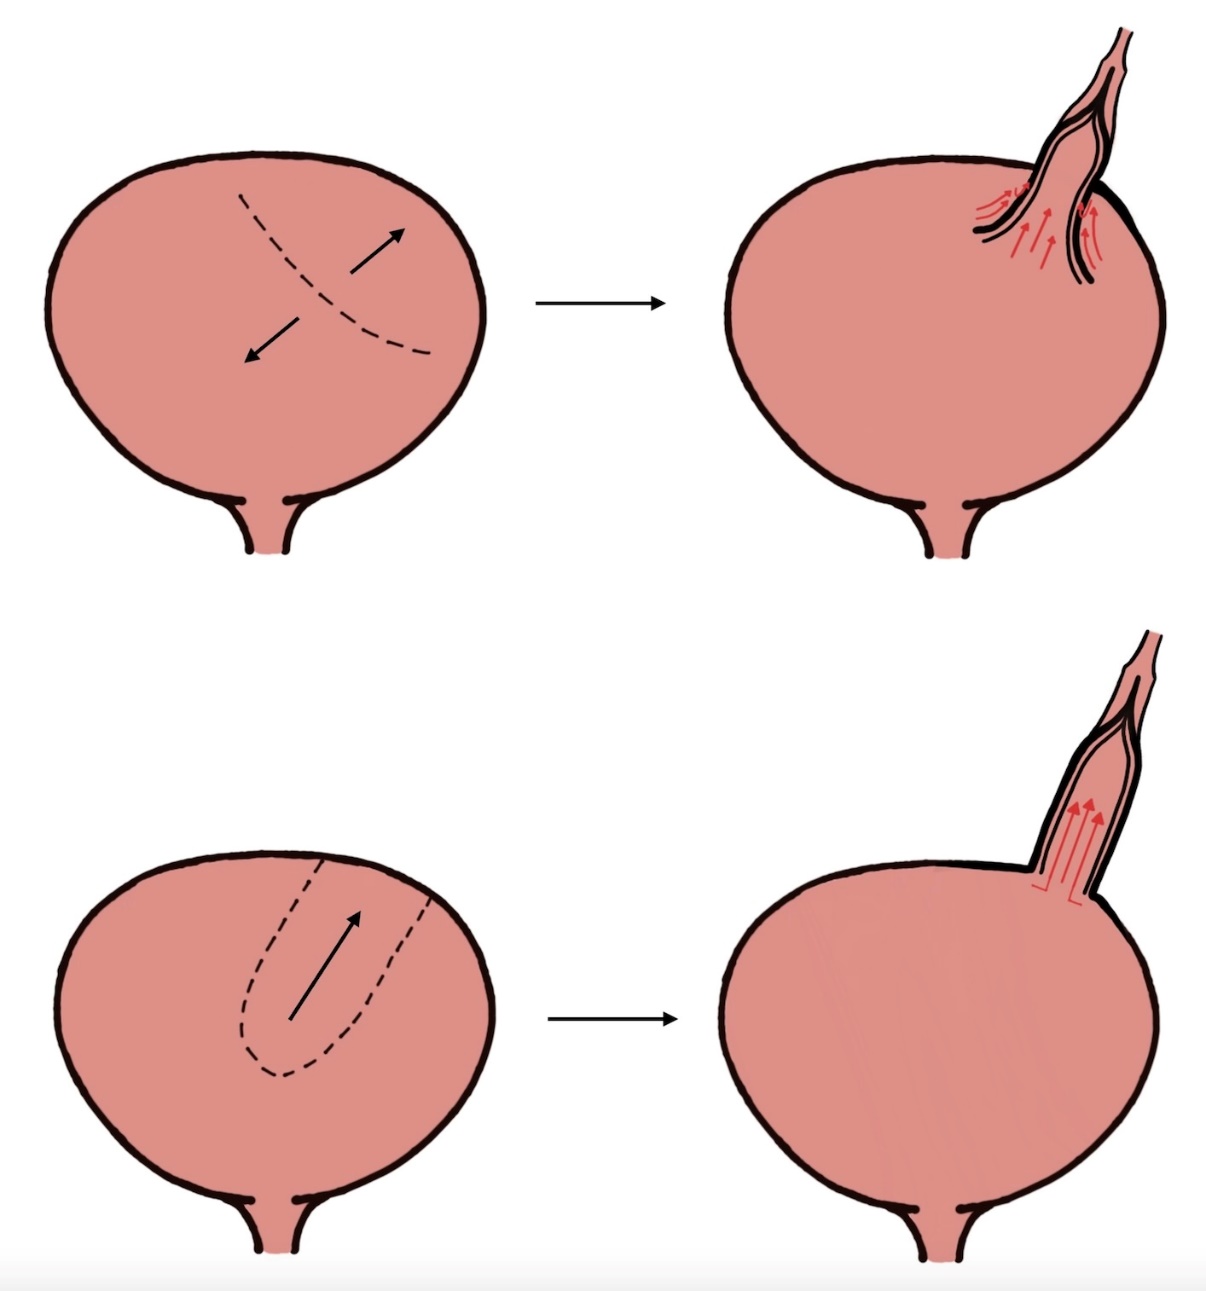


Supplementary Figure 3 – Proposed blood supply comparison, bladder elongation (top) vs Boari flap (bottom)
